# Supplementary material
Source: publisher figshare collection journal article supplement (https://rs.figshare.com/ndownloader/files/20694948)
Supplement: Supplementary file 1 [file 20694948]

**Table S3**. Plant vouchers for the DNA sequences analyzed in this study, with authors of species names, collectors and collecting sites, native species range, and GenBank accession numbers. Herbarium acronyms follow http://sweetgum.nybg.org/science/ih/

| **[Species](http://www.ncbi.nlm.nih.gov/Taxonomy/Browser/wwwtax.cgi?mode=Tree&id=13097&lvl=3&lin=f&keep=1&srchmode=1&unlock)** | **Voucher (herbarium)** | **Collecting site** | **Species native range** | **ITS** | **trnG-trnS intergenic spacer** | **trnL**  **intron** | **trnL-trnF intergenic spacer** |
| --- | --- | --- | --- | --- | --- | --- | --- |
| *[Illicium angustisepalum](http://www.ncbi.nlm.nih.gov/Taxonomy/Browser/wwwtax.cgi?mode=Info&id=124793&lvl=3&lin=f&keep=1&srchmode=1&unlock)* A. C. Smith | F.-W. Xin s.n. (HKU)1  T. Feild s.n. (UC)2 | Hong Kong; China1  Lantau Island, Hong Kong; China2 | Anhui, Fujian, Guangdong,  Hong Kong, China | AF163721 | EF1387682 | EF1387492 | - |
| *[Illicium anisatum](http://www.ncbi.nlm.nih.gov/Taxonomy/Browser/wwwtax.cgi?mode=Info&id=124794&lvl=3&lin=f&keep=1&srchmode=1&unlock)* L. | T.-H. Hsieh s.n. (HKU)1  S. Tsugaru 22362 (A)2 | Taiwan, China1  Honshu, Japan2 | Japan and Taiwan | AF1637291 | EF1387692 | EF1387502 | EF1387332 |
| *[Illicium arborescens](http://www.ncbi.nlm.nih.gov/Taxonomy/Browser/wwwtax.cgi?mode=Info&id=124795&lvl=3&lin=f&keep=1&srchmode=1&unlock)* Hayata | T.-H. Hsieh s.n. (HKU)1  Y-R. Lin 407 (A)2 | Taiwan, China1  Kaohsiung Hsien, Taiwan, China2 | Taiwan, China | AF1637231 | EF1387702 | EF1387512 | EF1387342 |
| *[Illicium burmanicum](http://www.ncbi.nlm.nih.gov/Taxonomy/Browser/wwwtax.cgi?mode=Info&id=1652689&lvl=3&lin=f&keep=1&srchmode=1&unlock)* E. H. Wilson | Su, JX. 20090602 (PE)  Not in chronogram | Lvchun, Yunnan, China | Yunnan, China;  Myanmar | KP689723 | - | - | - |
| [*Illicium cubense* A. C. Smith subsp. *bissei*](http://www.ncbi.nlm.nih.gov/Taxonomy/Browser/wwwtax.cgi?mode=Info&id=432237&lvl=3&lin=f&keep=1&srchmode=1&unlock) Imkhan. | A. Pinares s.n., cult., Jardin Botanico Nac. | Moa, Cuba | Cuba | EF138788 | EF138771 | EF138752 | EF138735 |
| *[Illicium difengpi](http://www.ncbi.nlm.nih.gov/Taxonomy/Browser/wwwtax.cgi?mode=Info&id=124772&lvl=3&lin=f&keep=1&srchmode=1&unlock)* B.N. Chang | G. Hao 126 (IBSC!) | China | Guangxi, China | AF163728 | EF138773 | EF138754 | EF138737 |
| *[Illicium dunnianum](http://www.ncbi.nlm.nih.gov/Taxonomy/Browser/wwwtax.cgi?mode=Tree&id=124773&lvl=3&lin=f&keep=1&srchmode=1&unlock)* Tutcher | S.X. Luo 447 (IBSC) | Nankunshan, Guangdong, China | Fujian, Guangdong, Guangxi, Guizhou, Hunan, China | GU354243 | - | GU354244 |  |
| [*Illicium ekmanii*](http://www.ncbi.nlm.nih.gov/Taxonomy/Browser/wwwtax.cgi?mode=Info&id=432239&lvl=3&lin=f&keep=1&srchmode=1&unlock) A. C. Smith | I. Mejia 2438 (FLAS) | Cordillera Central, Dominican Rep. | Dominican Republic and Haiti | EF138790 | EF138775 | EF138756 | EF138739 |
| *[Illicium fargesii](http://www.ncbi.nlm.nih.gov/Taxonomy/Browser/wwwtax.cgi?mode=Info&id=124774&lvl=3&lin=f&keep=1&srchmode=1&unlock)* Finet & Gagnepain | Q. Lin 982 (HKU) 1  Z. Liu 99079 (PE) 2  Supposedly a synonym of *I. simonsii*; see note there | Chongqing, China1  Nanchuan, Chongqing, China2 | Western China | AF1637301 | - | DQ342273 2 | DQ342273 2 |
| [*Illicium floridanum*](http://www.ncbi.nlm.nih.gov/Taxonomy/Browser/wwwtax.cgi?mode=Info&id=13098&lvl=3&lin=f&keep=1&srchmode=1&unlock)J. Ellis | K. Neubig 1-03 (FLAS) | Washington Parrish, LA, USA | SW North America | EF138791 | EF138776 | EF138757 | EF138740 |
| *[Illicium guajaibonense](http://www.ncbi.nlm.nih.gov/Taxonomy/Browser/wwwtax.cgi?mode=Info&id=432238&lvl=3&lin=f&keep=1&srchmode=1&unlock)* (Imkhan) Judd & J.R. Abott, formerly a subspecies of *I. cubense* A. C. Smith | R. Abbott 18885 (FLAS) | Pan de Guajaibon, Cuba | Cuba | EF138789 | EF138772 | EF138753 | EF138736 |
| *[Illicium henryi](http://www.ncbi.nlm.nih.gov/Taxonomy/Browser/wwwtax.cgi?mode=Info&id=114516&lvl=3&lin=f&keep=1&srchmode=1&unlock)* Diels | S.X. Luo 803 (IBSC) | Guangwushan, Sichuan, China | Central to West China | - | KY523610 | KY523629 | - |
| [*Illicium hottense*](http://www.ncbi.nlm.nih.gov/Taxonomy/Browser/wwwtax.cgi?mode=Info&id=432240&lvl=3&lin=f&keep=1&srchmode=1&unlock) A. Guerrero, Judd & A. B. Morris | W.S. Judd 4038 (FLAS) | Massif de la Hotte, Haiti | Haiti | EF138792 | EF138778 | EF138759 | EF138742 |
| *Illicium jiadifengpi* B.N. Chang | F. Cui 181_5 (IBSC) | Tianjinshan, Guangdong, China | SW China | KY523593 | KY523611 | KY523630 | KY523648 |
| *Illicium jiadifengpi* B.N. Chang | F. Cui 181_7 (IBSC) | Tianjinshan, Guangdong, China | See above | KY523594 | KY523612 | KY523631 | KY523649 |
| *[Illicium lanceolatum](http://www.ncbi.nlm.nih.gov/Taxonomy/Browser/wwwtax.cgi?mode=Info&id=121383&lvl=3&lin=f&keep=1&srchmode=1&unlock)* A. C. Smith | ZW. Wang 195 (IBSC) | Hengshan, Hunan, China | Central to East China | - | KY523613 | KY523632 | KY523650 |
| *[Illicium leiophyllum](http://www.ncbi.nlm.nih.gov/Taxonomy/Browser/wwwtax.cgi?mode=Info&id=432241&lvl=3&lin=f&keep=1&srchmode=1&unlock)* A. C. Smith | K. Carpenter s.n. (HKU?) | Hong Kong, China | Hong Kong, China | EF138793 | EF138780 | EF138761 | EF138744 |
| *[Illicium majus](http://www.ncbi.nlm.nih.gov/Taxonomy/Browser/wwwtax.cgi?mode=Info&id=124775&lvl=3&lin=f&keep=1&srchmode=1&unlock)* J. D. Hooker & Thomson | G. Hao 104 (IBSC!)  Not in chronogram | South China Botanical Garden, Guangdong, China | Probably West China to India | AF163733 | - | - | - |
| [*Illicium mexicanum*](http://www.ncbi.nlm.nih.gov/Taxonomy/Browser/wwwtax.cgi?mode=Info&id=432242&lvl=3&lin=f&keep=1&srchmode=1&unlock) A. C. Smith | J. Fairey T26M61S (UC) | Tamaulipas State, Mexico | Mexico | EF138794 | EF138781 | EF138762 | EF138745 |
| *[Illicium micranthum](http://www.ncbi.nlm.nih.gov/Taxonomy/Browser/wwwtax.cgi?mode=Info&id=124776&lvl=3&lin=f&keep=1&srchmode=1&unlock)* Dunn | S.X. Luo 803 (IBSC) | Jinfoshan, Chongqing, China | SW China | KY523595 | KY523614 | KY523633 | KY523651 |
| *[Illicium oligandrum](http://www.ncbi.nlm.nih.gov/Taxonomy/Browser/wwwtax.cgi?mode=Info&id=145286&lvl=3&lin=f&keep=1&srchmode=1&unlock)* Merrill & Chun | K. Carpenter s.n. (HKU) | Dialoushan, Hainan, China | Guangxi, Hainan, China | EF138795 | EF138783 | EF138764 | EF138746 |
| [*Illicium oligandrum*](http://www.ncbi.nlm.nih.gov/Taxonomy/Browser/wwwtax.cgi?mode=Info&id=145286&lvl=3&lin=f&keep=1&srchmode=1&unlock) Merrill & Chun | YH. Wu 5 (IBSC) | Dialoushan, Hainan, China | See above | KY523596 | KY523615 | KY523634 | KY523652 |
| [*Illicium parviflorum*](http://www.ncbi.nlm.nih.gov/Taxonomy/Browser/wwwtax.cgi?mode=Info&id=13099&lvl=3&lin=f&keep=1&srchmode=1&unlock) Michx. ex Vent | A.B. Morris s.n. (FLAS) | Florida, North America | USA | EF138796 | EF138784 | EF138765 | EF138747 |
| *[Illicium philippinense](http://www.ncbi.nlm.nih.gov/Taxonomy/Browser/wwwtax.cgi?mode=Info&id=1652690&lvl=3&lin=f&keep=1&srchmode=1&unlock)* Merrill | ZD. Chen 20110783 (PE)  Not in chronogram | Yilan, Taiwan, China | Taiwan, China;  Philippines | KP689731 | - | - | - |
| *Illicium simonsii* Maxim. (incl. synonym *I.* [*fargesii*](http://www.ncbi.nlm.nih.gov/Taxonomy/Browser/wwwtax.cgi?mode=Info&id=124774&lvl=3&lin=f&keep=1&srchmode=1&unlock) Finet & Gagnepain) | Q. Lin 982 (HKU) 1  Z. Liu 99079 (PE) 2 | Chongqing, China1, 2 | See above | AF1637301 | - | DQ342273 2 | DQ342273 2 |
| *Illicium spec.* Cui 184 | F. Cui 184 (IBSC) | Tianjinshan, Guangdong, China | Guangdong, China | KY523597 | KY523616 | KY523635 | KY523653 |
| *[Illicium spathulatum](http://www.ncbi.nlm.nih.gov/Taxonomy/Browser/wwwtax.cgi?mode=Info&id=124777&lvl=3&lin=f&keep=1&srchmode=1&unlock)* Y. C. Wu (perhaps a synonym of *I. majus*) | Q. Lin & G. Hao 940 (IBSC)  Not in chronogram | Guangdong, China | SW China | AF163722 | - | - | - |
| *[Illicium](http://www.ncbi.nlm.nih.gov/Taxonomy/Browser/wwwtax.cgi?mode=Info&id=432243&lvl=3&lin=f&keep=1&srchmode=1&unlock)* *[ternstroemioides](http://www.ncbi.nlm.nih.gov/Taxonomy/Browser/wwwtax.cgi?mode=Info&id=432243&lvl=3&lin=f&keep=1&srchmode=1&unlock)* A. C. Smith | L. Anming 2019, grown at the Birmingham Botanical Garden, Birmingham, Alabama fide Morris et al. (2007) | Hainan, China | Fujian and Hainan in China | EF138797 | EF138785 | EF138766 | EF138748 |
| [*Illicium ternstroemioides*](http://www.ncbi.nlm.nih.gov/Taxonomy/Browser/wwwtax.cgi?mode=Info&id=432243&lvl=3&lin=f&keep=1&srchmode=1&unlock) A. C. Smith | YH. Wu 17_2 (IBSC) | Bawanling, Hainan, China | See above | KY523598 | KY523617 | KY523636 | KY523654 |
| [*Illicium ternstroemioides*](http://www.ncbi.nlm.nih.gov/Taxonomy/Browser/wwwtax.cgi?mode=Info&id=432243&lvl=3&lin=f&keep=1&srchmode=1&unlock) A. C. Smith | YH. Wu 17_3 (IBSC) | Bawanling, Hainan, China | See above | KY523599 | KY523618 | KY523637 | KY523655 |
| *[Illicium tsangii](http://www.ncbi.nlm.nih.gov/Taxonomy/Browser/wwwtax.cgi?mode=Info&id=889078&lvl=3&lin=f&keep=1&srchmode=1&unlock)* A. C. Smith | S.X. Luo 448 (IBSC) | Nunkunshan, Guangdong | Guangdong, China | GU354242 | - | GU354245 | - |
| *[Illicium verum](http://www.ncbi.nlm.nih.gov/Taxonomy/Browser/wwwtax.cgi?mode=Info&id=124778&lvl=3&lin=f&keep=1&srchmode=1&unlock)*  Hooker f. | G. Hao 103 (IBSC!) | China | Guangxi, China | AF163724 | - | - | - |
| *Kadsura acsmithii*  R. M. K.Saunders | J. Bogner 2703 (M) | Borneo, Sarawak, Mt. Santubong | Borneo | KY495166 | KY495174 | KY495186 | - |
| [*Kadsura angustifolia*](http://www.ncbi.nlm.nih.gov/Taxonomy/Browser/wwwtax.cgi?mode=Info&id=124779&lvl=3&lin=f&keep=1&srchmode=1&unlock) A. C. Smith | Q. Lin 986 (IBSC) | Hunan, China | Southern China;  Myanmar; Vietnam | AF163715 | - | - | - |
| *[Kadsura coccinea](http://www.ncbi.nlm.nih.gov/Taxonomy/Browser/wwwtax.cgi?mode=Info&id=124780&lvl=3&lin=f&keep=1&srchmode=1&unlock)* (Lem.) A. C. Smith | F. Cui 186 (IBSC) | Tianjinshan, Guangdong, China | Central SW China;  Myanmar; Vietnam, Laos Thailand | KY495161 | KY495167 | KY495181 | KY495176 |
| [*Kadsura coccinea*](http://www.ncbi.nlm.nih.gov/Taxonomy/Browser/wwwtax.cgi?mode=Info&id=124780&lvl=3&lin=f&keep=1&srchmode=1&unlock)(Lem.) A. C. Smith | F. Cui 196 (IBSC) | Tianjinshan, Guangdong, China | See above | KY495162 | KY495168 | KY495182 | KY495177 |
| [*Kadsura coccinea*](http://www.ncbi.nlm.nih.gov/Taxonomy/Browser/wwwtax.cgi?mode=Info&id=124780&lvl=3&lin=f&keep=1&srchmode=1&unlock)(Lem.)A. C. Smith | S.X. Luo 800 (IBSC) | Jinfoshan, Chongqing, China | See above | KY495163 | KY495169 | KY495183 | KY495178 |
| *[Kadsura heteroclita](http://www.ncbi.nlm.nih.gov/Taxonomy/Browser/wwwtax.cgi?mode=Info&id=124781&lvl=3&lin=f&keep=1&srchmode=1&unlock)* (Roxb.) Craib | Zhen-Yu Li 11138c (PE)1  G. Hao 150 (HKU)2 | Nanchuan, Chongqing, China  Hong Kong1, 2 | Southern China, SE Asia | AF1637132 | - | DQ3422671 | DQ3422671 |
| *[Kadsura japonica](http://www.ncbi.nlm.nih.gov/Taxonomy/Browser/wwwtax.cgi?mode=Info&id=105750&lvl=3&lin=f&keep=1&srchmode=1&unlock)* (L.) Dunal | D.E. Soltis & P.S. Soltis s.n., cult., no voucher? | Cult. Natl. Arb., Washington | Taiwan, Japan, Korea | EF138798 | EF138786 | EF138767 | EF138731 |
| [*Kadsura japonica*](http://www.ncbi.nlm.nih.gov/Taxonomy/Browser/wwwtax.cgi?mode=Info&id=105750&lvl=3&lin=f&keep=1&srchmode=1&unlock) (L.) Dunal | Ohashi *et al*. 141 (M)  Not in chronogram | Tsushima Island, Kyushu, Japan | See above | - | KY495170 | - | - |
| *[Kadsura longipedunculata](http://www.ncbi.nlm.nih.gov/Taxonomy/Browser/wwwtax.cgi?mode=Info&id=124782&lvl=3&lin=f&keep=1&srchmode=1&unlock)* Finet & Gagnepain | G. Hao 106 (IBSC!)1  Qi Lin 971 (IBSC on loan to PE)2 | Guangzhou, Guangdong1, 2, China | East to West China | AF163711 | - | DQ3422682 | DQ3422682 |
| *Kadsura marmorata* (Hend. & Andr.Hend.) A.C.Smith | J. & M.S. Clemens 29354 (M)  Not in chronogram | Mt. Kinabalu, Borneo | Borneo, Philippines | - | KY495171 | - | - |
| *[Kadsura oblongifolia](http://www.ncbi.nlm.nih.gov/Taxonomy/Browser/wwwtax.cgi?mode=Info&id=124783&lvl=3&lin=f&keep=1&srchmode=1&unlock)* Merrill | Y H Wu 25_6 (IBSC) | Danzhou, Hainan, China | Guangdong, Guangxi and Hainan | KY495164 | KY495172 | KY495184 | KY495179 |
| [*Kadsura oblongifolia*](http://www.ncbi.nlm.nih.gov/Taxonomy/Browser/wwwtax.cgi?mode=Info&id=124783&lvl=3&lin=f&keep=1&srchmode=1&unlock)Merrill | Y H Wu 25_7 (IBSC) | Danzhou, Hainan, China | See above | KY495165 | KY495173 | KY495185 | KY495180 |
| [*Kadsura scandens*](http://www.ncbi.nlm.nih.gov/Taxonomy/Browser/wwwtax.cgi?mode=Info&id=124784&lvl=3&lin=f&keep=1&srchmode=1&unlock) (Blume) Blume | Cultivated in the Kebun Raya Botanical Garden, XVI. E125, no voucher? | Bogor Botanical Gardens (=Kebun Raya Bogor), Indonesia | Malay Peninsula, Sumatra, Java, Bali | AF163719 | - | DQ342270 | DQ342270 |
| *[Schisandra arisanensis](http://www.ncbi.nlm.nih.gov/Taxonomy/Browser/wwwtax.cgi?mode=Info&id=453241&lvl=3&lin=f&keep=1&srchmode=1&unlock)* Hayata | Ying, TS. 20040225 (PE)  Not in chronogram | Taoyuan, Taiwan, China | Central to East China, Taiwan and Zhejiang | KP689638 | - | - | - |
| *[Schisandra chinensis](http://www.ncbi.nlm.nih.gov/Taxonomy/Browser/wwwtax.cgi?mode=Info&id=50507&lvl=3&lin=f&keep=1&srchmode=1&unlock)* (Turcz.) Baillon | Z. Liu 99087 (PE) | Mentougou, Beijing, China | North China;  North Japan;  Korea;  Russia (Far East) | AF263441 | - | DQ342262 | DQ342262 |
| *[Schisandra elongata](http://www.ncbi.nlm.nih.gov/Taxonomy/Browser/wwwtax.cgi?mode=Info&id=1652687&lvl=3&lin=f&keep=1&srchmode=1&unlock)* (Blume) Baillon | Ren, BQ. 20081056 (PE)  Not in chronogram | Yunyang, Chongqing, China | Range unclear | KP689650 | - | - | - |
| *[Schisandra glabra](http://www.ncbi.nlm.nih.gov/Taxonomy/Browser/wwwtax.cgi?mode=Info&id=124786&lvl=3&lin=f&keep=1&srchmode=1&unlock)* (Brickell) Rehder | L. Thien 20020 cult. (NO = Tulane University) | Clark Creek, Mississippi,USA | Southern North America | EF138799 | EF138787 | EF210566 | EF138732 |
| *[Schisandra glaucescens](http://www.ncbi.nlm.nih.gov/Taxonomy/Browser/wwwtax.cgi?mode=Info&id=124787&lvl=3&lin=f&keep=1&srchmode=1&unlock)* Diels | Z. Liu 99076 (PE)1 | Nanchuan, Chongqing, China | Chongqing, Shanxi and Hubei, China | AF2634391 | - | DQ3422581 | DQ3422581 |
| *[Schisandra glaucescens](http://www.ncbi.nlm.nih.gov/Taxonomy/Browser/wwwtax.cgi?mode=Info&id=124787&lvl=3&lin=f&keep=1&srchmode=1&unlock)* Diels | S.X. Luo 804 (IBSC) | Xian, Shanxi, China | See above | KY523600 | KY523619 | KY523638 | KY523656 |
| *[Schisandra grandiflora](http://www.ncbi.nlm.nih.gov/Taxonomy/Browser/wwwtax.cgi?mode=Info&id=124788&lvl=3&lin=f&keep=1&srchmode=1&unlock)* (Wall.) Hook.f. & Thomson | 1Cult. RBGE 19810349, no herbarium voucher; pers. comm. from E to SSR, 3 Nov. 2016  2Z. Liu 99076 (PE) | 2Chongqing, China | Xizang, China;  Bhutan;  Nepal, N orth India | AF1637071 | - | DQ3422592 | DQ3422592 |
| *[Schisandra henryi](http://www.ncbi.nlm.nih.gov/Taxonomy/Browser/wwwtax.cgi?mode=Info&id=124789&lvl=3&lin=f&keep=1&srchmode=1&unlock)* C. B. Clarke | S. Yuan 488 (IBSC) | Emeishan Sichuan, China | Central to West China | KY523601 | KY523620 | KY523639 | KY523657 |
| *[Schisandra plena](http://www.ncbi.nlm.nih.gov/Taxonomy/Browser/wwwtax.cgi?mode=Info&id=133444&lvl=3&lin=f&keep=1&srchmode=1&unlock)* A. C. Smith (name should be transferred to *Kadsura*) | Z. Liu 99053 (PE) | Jinghong, Yunnan, China | Yunnan, China; India | AF263443 | - | DQ342266 | DQ342266 |
| *[Schisandra propinqua](http://www.ncbi.nlm.nih.gov/Taxonomy/Browser/wwwtax.cgi?mode=Tree&id=124790&lvl=3&lin=f&keep=1&srchmode=1&unlock)* (Wall.) Baillon (name should be transferred to *Kadsura*) | RZ. Lin 20103028 (PE) | Emeishan, Sichuan, China | West China;  Nepal, India; Indonesia; Java; Myanmar; Thailand | KP689687 | - | - | - |
| *[Schisandra pubescens](http://www.ncbi.nlm.nih.gov/Taxonomy/Browser/wwwtax.cgi?mode=Info&id=124785&lvl=3&lin=f&keep=1&srchmode=1&unlock)* Hemsley & E. H. Wilson | Q. Lin 984 (HKU) | Nanchuan, Chongqing, China | Chongqing, Hubei and Sichuan in China | AF163709 | - | DQ342260 | DQ342260 |
| [*Schisandra pubescens*](http://www.ncbi.nlm.nih.gov/Taxonomy/Browser/wwwtax.cgi?mode=Info&id=124785&lvl=3&lin=f&keep=1&srchmode=1&unlock)Hemsley & E. H. Wilson | S.X. Luo 801 (IBSC) | Jinfoshan, Chongqing, China | See above | KY523602 | KY523621 | KY523640 | KY523658 |
| *[Schisandra repanda](http://www.ncbi.nlm.nih.gov/Taxonomy/Browser/wwwtax.cgi?mode=Info&id=81864&lvl=3&lin=f&keep=1&srchmode=1&unlock)*  (Siebold & Zucc.) Radlk. | J.H. Fan (PE) | Japan | Japan | KP689680 | - | - | - |
| *[Schisandra rubriflora](http://www.ncbi.nlm.nih.gov/Taxonomy/Browser/wwwtax.cgi?mode=Info&id=124791&lvl=3&lin=f&keep=1&srchmode=1&unlock)* Rehder & E. H. Wilson | S. Yuan 467 (IBSC) | Emeishan, Sichuan, China;  Near type locality of this name | Sichuan and Yunnan, China; India; Myanmar | KY523603 | KY523622 | KY523641 | KY523659 |
| [*Schisandra rubriflora*](http://www.ncbi.nlm.nih.gov/Taxonomy/Browser/wwwtax.cgi?mode=Info&id=124791&lvl=3&lin=f&keep=1&srchmode=1&unlock)Rehder & E. H. Wilson | S. Yuan 512 (IBSC) | Emeishan, Sichuan, China | See above | KY523604 | KY523623 | KY523642 | KY523660 |
| *Schisandra spec.* SX Luo 761 | S.X. Luo 761 (IBSC) | Daweishan, Yunnan, China | Yunnan China | KY523605 | KY523624 | KY523643 | KY523661 |
| *Schisandra spec.* ZWWang 193 | ZW. Wang 193 (IBSC) | Hengshan, Hunan, China | Hengshan Hunan, China | KY523606 | KY523625 | KY523644 | KY523662 |
| *Schisandra sphaerandra* Stapf | S. Yuan 487 (IBSC) | Emeishan Sichuan, China | Sichuan and Yunnan, China | KY523607 | KY523626 | KY523645 | KY523663 |
| *Schisandra sphaerandra* Stapf | S. Yuan 511 (IBSC) | Dawashan, Sichuan, China | See above | KY523608 | KY523627 | KY523646 | KY523664 |
| *[Schisandra sphenanthera](http://www.ncbi.nlm.nih.gov/Taxonomy/Browser/wwwtax.cgi?mode=Info&id=13674&lvl=3&lin=f&keep=1&srchmode=1&unlock)* Rehder & E. H. Wilson | ZW. Wang 192 (IBSC) | Hengshan, Huanan, China | Most of China except in the NE | KY523609 | KY523628 | KY523647 | KY523665 |
| [*Schisandra sphenanthera*](http://www.ncbi.nlm.nih.gov/Taxonomy/Browser/wwwtax.cgi?mode=Info&id=13674&lvl=3&lin=f&keep=1&srchmode=1&unlock)Rehder & E. H. Wilson | YH. Wu 28 (IBSC) | Lushan, Jiangxi, China | See above | - | KY495175 | KY495187 | - |
| *[Schisandra viridis](http://www.ncbi.nlm.nih.gov/Taxonomy/Browser/wwwtax.cgi?mode=Info&id=124792&lvl=3&lin=f&keep=1&srchmode=1&unlock)* A. C. Smith | Q. Lin 975 (IBSC) | Hengshan, Hunan, China | East and Central China | AF263438 | - | DQ342257 | DQ342257 |
| *Austrobaileya scandens* C. T. White | Y. Qiu 90030 (NCU) | Cultivated material? | Australia | EF201562 | EF210563 | EF210565 | AY145326 |
